# Supplementary material for: Enabling fast ionic transport in CeO2–La1−2xBaxBixFeO3 nanocomposite electrolyte for low temperature solid oxide fuel cell application
Source: Royal Society of Chemistry journal article supplement (doi:10.1039/d3ra01698f), 2023-01-01
Supplement: d3ra01698f1.pdf [file d3ra01698f1.pdf]

## Electronic Supplementary Information

### Enabling fast ionic transport in $\text{CeO}_2\text{-La}_{1-2x}\text{Ba}_x\text{Bi}_x\text{FeO}_3$ nanocomposite electrolyte for low temperature solid oxide fuel cell application.

Nusrat Shaheen<sup>a,b</sup> Zheng Chen<sup>a,b\*</sup>, Yumei Nong<sup>a,b</sup>, Tao Su<sup>a,b</sup>, Muneerah Alomar<sup>c</sup>, Nada Althubaiti<sup>c</sup>, Muhammad Yousaf<sup>d</sup>, Yuzheng Lu<sup>e</sup>, Qiang Liu<sup>e\*\*</sup>

<sup>a</sup>*School of Civil Engineering and Architecture, State Key Laboratory of Featured Metal Materials and Life-cycle Safety for Composite Structures, Guangxi University, Nanning 530004, PR China*

<sup>b</sup>*Key Laboratory of Disaster Prevention and Structural Safety of China Ministry of Education, School of Civil Engineering and Architecture, Guangxi University, Nanning 530004, China*

<sup>c</sup>*Department of Physics, College of Sciences, Princess Nourah bint Abdulrahman University, P. O. Box 84428, Riyadh, 11671 Saudi Arabia*

<sup>d</sup>*Energy Storage Joint Research Center, School of Energy and Environment, Southeast University, No.2 Si Pai Lou, Nanjing 210096, China*

<sup>e</sup>*College of Electronic and Engineering, Nanjing Xiaozhuang University Nanjing 211171, China*

\*Correspondence to :Zheng Chen: [chenzheng@gxu.edu.cn](mailto:chenzheng@gxu.edu.cn), Qiang Liu: [qiangliu@njxzu.edu.cn](mailto:qiangliu@njxzu.edu.cn)

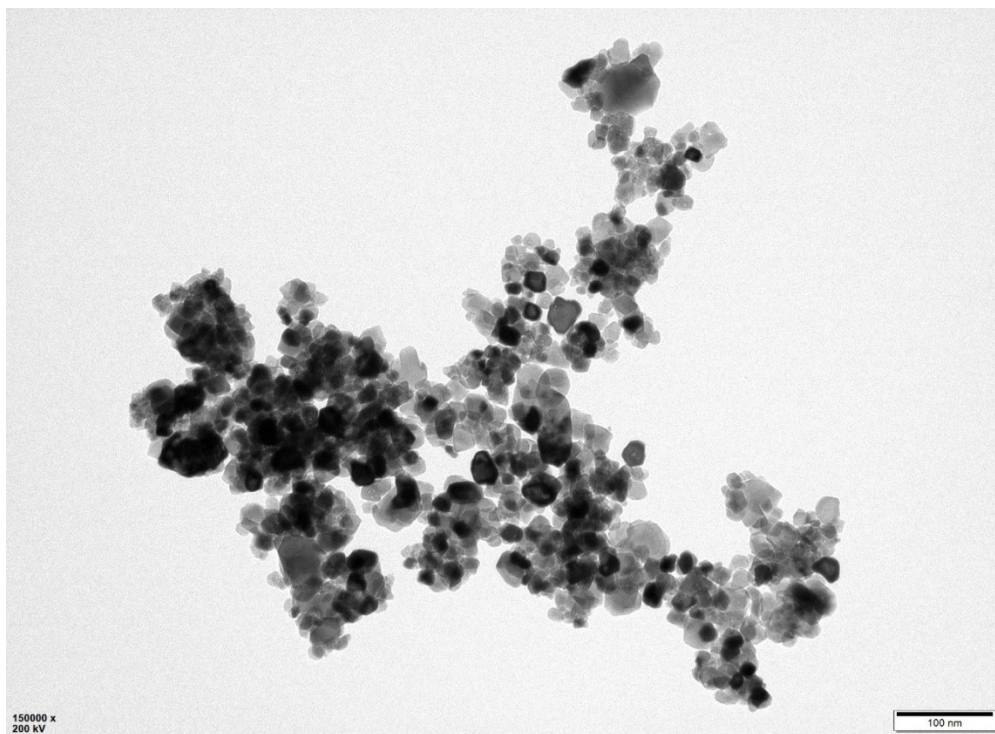

**Fig. S1.** HR-TEM images of CeO<sub>2</sub>-LBBF

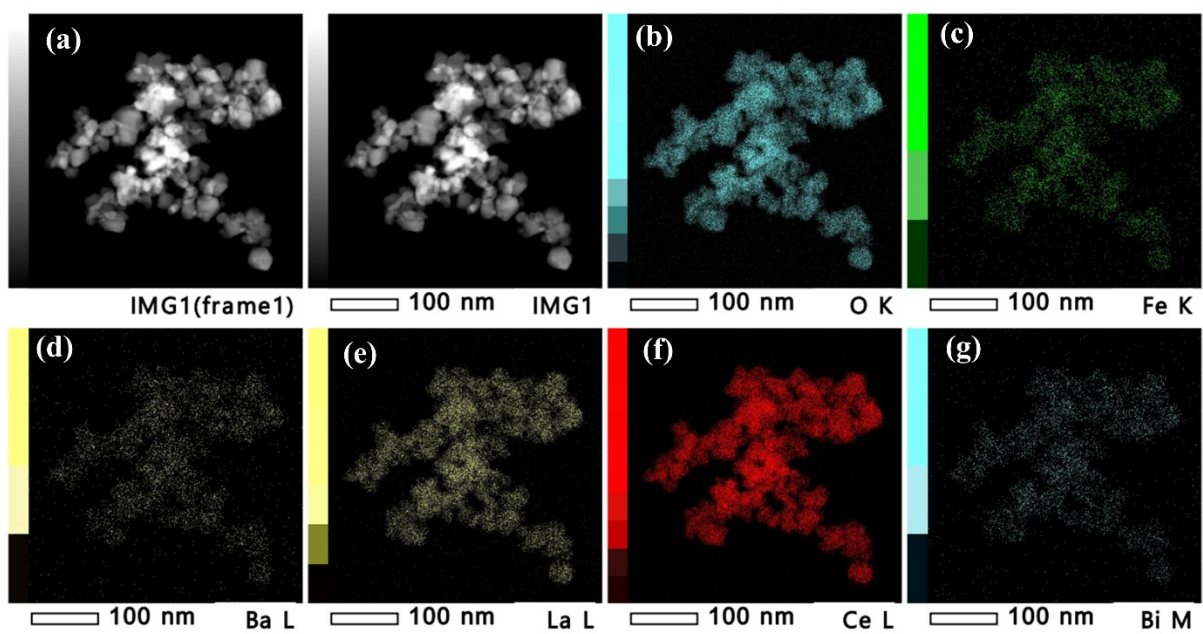

**Fig. S2.** (a) HR-TEM micrograph of  $^{90}\text{CeO}_2\text{-10LBBF}$  (b-g) EDS mapping of Ce, La, Ba, Bi, Fe, and O of  $^{90}\text{CeO}_2\text{-10LBBF}$ .

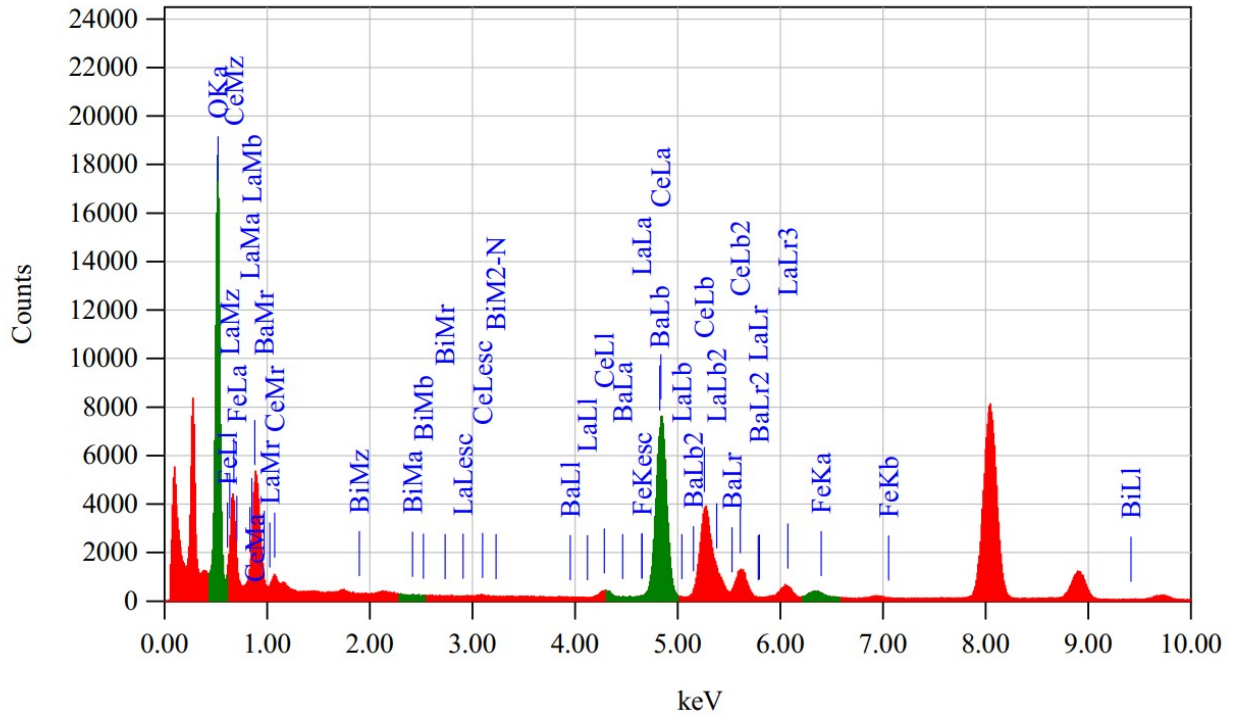

**Fig. S3.** Elemental mapping graph of 90CeO<sub>2</sub>-10LBBF

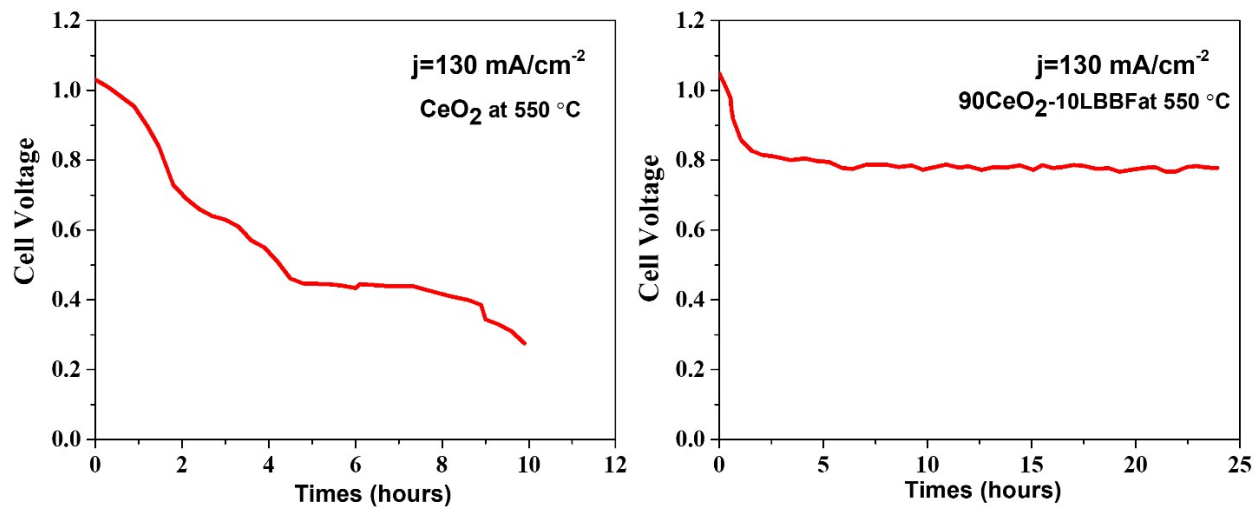

**Fig. S4.** Stability test of CeO<sub>2</sub> and 90CeO<sub>2</sub>-10LBBF electrolyte-based SOFC device at 550 °C under current density  $j = 130 \text{ mA cm}^{-2}$ .

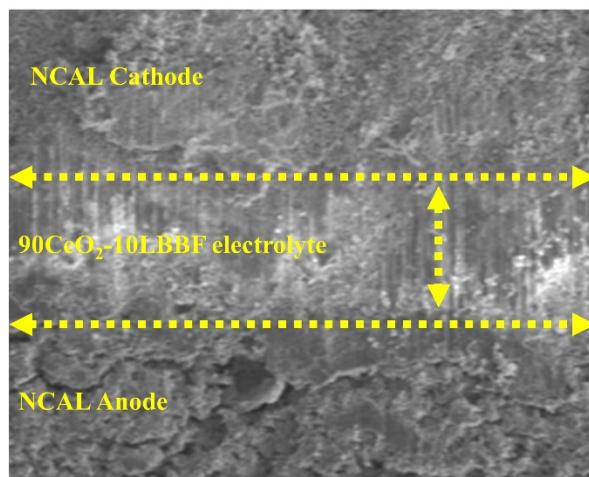

**Fig. S5.** Cross-sectional SEM of the 90CeO<sub>2</sub>-10LBBF electrolyte after fuel cell performance
